# Supplementary material
Source: Springer Nature journal article supplement (https://www.springermedizin.de/resource/supplementary/12885_2009_1943_MOESM1_ESM.pdf/9460148)
Supplement: MOESM1 [file 9460148]

Health behavioral risk factors

- Alcohol consumption
- Lifetime smoker
- Physical activity of moderate intensity

Psychological and cognitive factors

- Stress
- Self-reported depression
- Attitude towards effectiveness of medical examination

Use of breast cancer screening service

Socio-demographic factors

- Age
- Education
- Household monthly income
- National Health Insurance /Medicaid
- Private health insurance
- Marital status
- Residential area

Physical function and health status

- Self-reported health status
- Number of chronic diseases
- Disabled
- Visual problem
- Hearing problem
- Walking problem
- Limitation of daily activities
